# Supplementary material
Source: PubMed Central journal article supplement (PMC4811704)
Supplement: NIHMS756731-supplement-2.pdf [file NIHMS756731-supplement-2.pdf]

**Supplementary Table 1. AP firing frequency in WT and *TDP* mice (3-week old), in the absence and presence of PTX.**

| Current-injected (pA) | WT (n= 53)   | <i>TDP</i> (n =58) | WT+PTX (n = 40) | <i>TDP</i> +PTX (n = 50) |
|-----------------------|--------------|--------------------|-----------------|--------------------------|
| 0                     | 0            | 0                  | 0               | 0.35 ± 0.35              |
| 200                   | 14.67 ± 1.14 | 21.9 ± 0.87        | 27.63 ± 1.26    | 29.5 ± 2.04              |
| 400                   | 37.36 ± 1.42 | 45.91 ± 1.20       | 51.56 ± 1.75    | 54.65 ± 2.50             |
| 600                   | 51.84 ± 1.66 | 62.63 ± 1.65       | 68.06 ± 2.15    | 73.2 ± 3.09              |

**Supplementary Table 2. AP firing frequency in WT and *TDP* mice (15-week old).**

| Current-injected<br>(pA) | WT         | <i>TDP</i> |
|--------------------------|------------|------------|
| 0                        | 0          | 0          |
| 200                      | 25.3 ± 3.2 | 29.9 ± 3.4 |
| 400                      | 57.2 ± 4.3 | 65.8 ± 4.7 |
| 600                      | 74.4 ± 4.2 | 89.1 ± 5.0 |

**Supplementary Table 3. Dendritic bleb analysis in *TDP::YFP* and *YFP* control mice.**

Top table shows the bleb density analysis and bottom table shows the bleb size analysis.

| Bleb density (number in<br>22500 $\mu\text{m}^2$ ) | <i>YFP</i> | <i>TDP::YFP</i> |
|----------------------------------------------------|------------|-----------------|
| 6 week                                             | 0 $\pm$ 0  | 1.19 $\pm$ 0.74 |
| 9 week                                             | 0 $\pm$ 0  | 6.00 $\pm$ 1.07 |
| 15 week                                            | 0 $\pm$ 0  | 1.57 $\pm$ 0.37 |

| Bleb size ( $\mu\text{m}^2$ ) | <i>YFP</i> | <i>TDP::YFP</i>  |
|-------------------------------|------------|------------------|
| 6 week                        | 0 $\pm$ 0  | 6.92 $\pm$ 0.99  |
| 9 week                        | 0 $\pm$ 0  | 14.86 $\pm$ 1.47 |
| 15 week                       | 0 $\pm$ 0  | 13.02 $\pm$ 3.19 |

**Supplementary Table 4. Ubiquitin pathology in M1 cortex of *TDP* mice.**

| Ubiquitin positive neuron number | WT    | <i>TDP</i>   |
|----------------------------------|-------|--------------|
| 6 week                           | 0 ± 0 | 1.76 ± 0.36  |
| 9 week                           | 0 ± 0 | 6.47 ± 0.72  |
| 15 week                          | 0 ± 0 | 39.61 ± 1.70 |
